# Supplementary material
Source: PubMed Central journal article supplement (PMC5296398)
Supplement: NIHMS835409-supplement-1.pdf [file NIHMS835409-supplement-1.pdf]

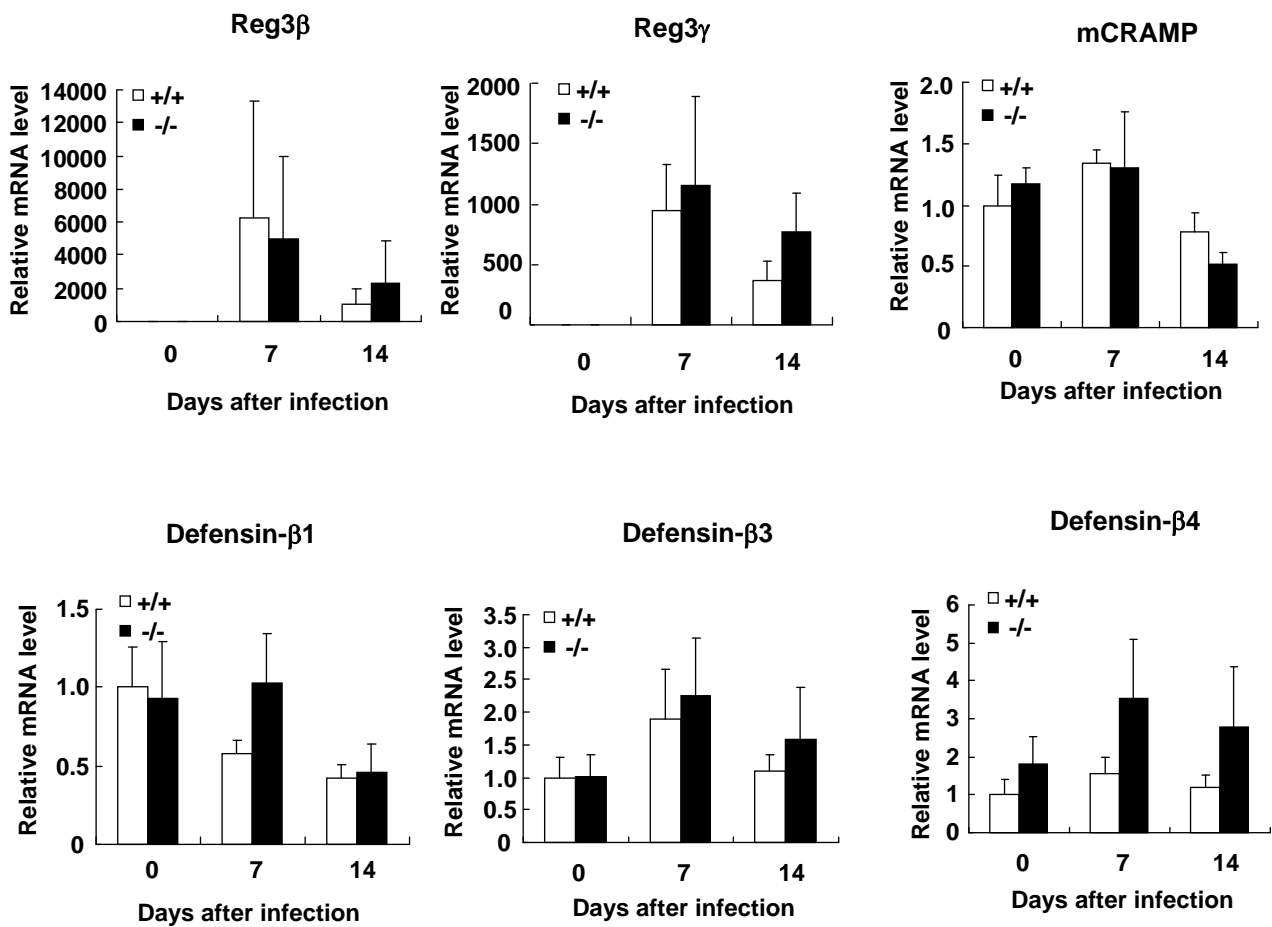

**Figure S1. SRC-3 deficiency dose not impair the expression of antimicrobial genes during *C. rodentium* infection.** Quantitative RT-PCR results of Reg3 $\beta$ , Reg3 $\gamma$ , mCRAMP, defensin- $\beta$ 1, defensin- $\beta$  3 and defensin- $\beta$  4 relative to day 0 in the distal colons of wild-type and SRC-3<sup>-/-</sup> mice on day 7 and day 14 after infection. Data are the means + SEM of five to ten mice per group. Results are representative of two independent experiments.

**Figure S1**

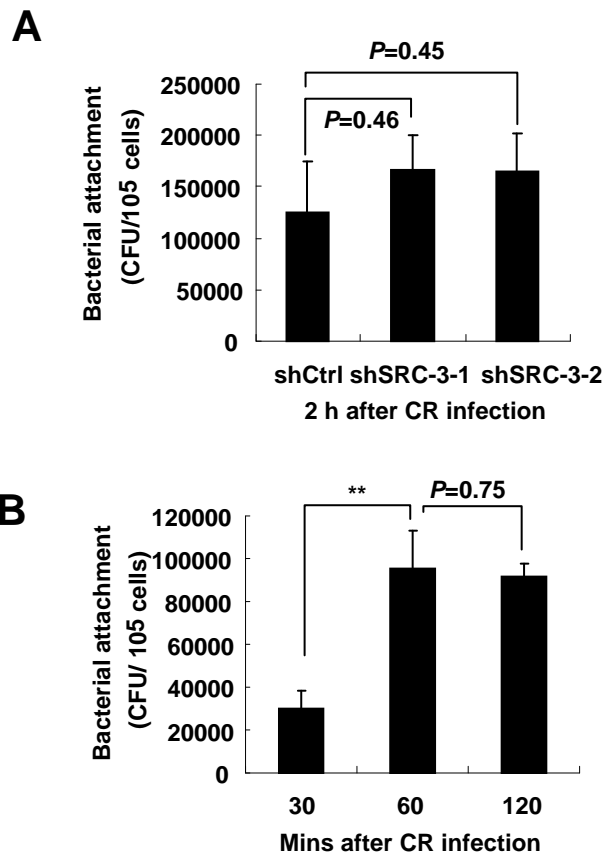

**Figure S2. Adherence of *C. rodentium* to CMT93 cells** A, shCtrl and shSRC-3 CMT-93 cells grown as adherent monolayers in 12-well plates, were infected with *C. rodentium* at MOI 200 for 2 hours. Bacterial adherence was determined by CFU assay. B, CMT-93 cells grown as adherent monolayers in 12-well plates were infected with *C. rodentium* at MOI 200 for 30 mins, 60 mins and 120 mins, respectively. Bacterial adherence was determined by CFU assay.

**Figure S2**

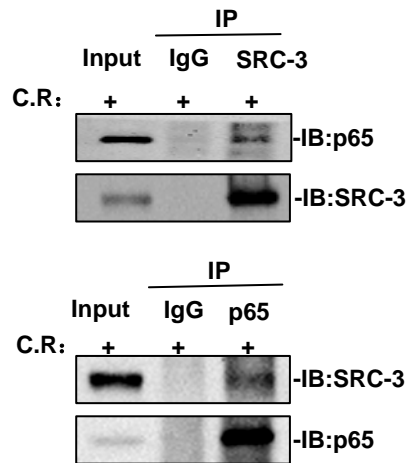

**Figure S3. Co-IP analysis of the interaction of endogenous SRC-3 and p65 in CMT93 cells infected with *C. rodentium* for 2 hours.** Anti-SRC-3 antibodies could immunoprecipitate p65 from cell lysates at 2 hours after *C.rodentium* infection. Reciprocally, anti-p65 antibodies could also immunoprecipitate SRC-3 from cell lysates at 2 hours after *C.rodentium* infection.

**Figure S3**

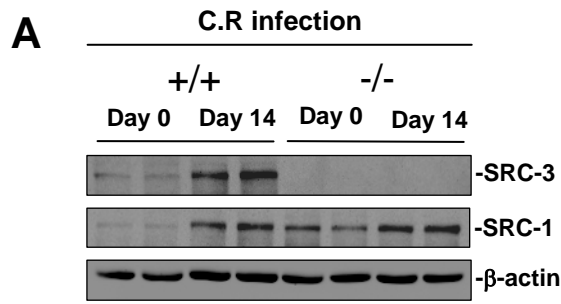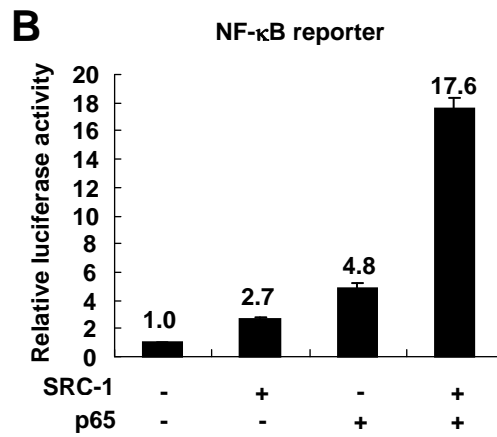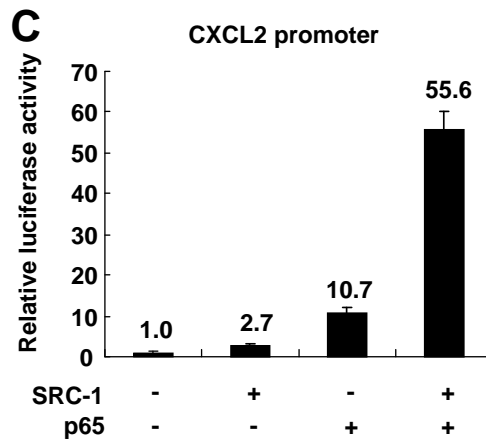

**Figure S4. SRC-1 is upregulated in colonic epithelial cells in response to *C. rodentium* infection and enhances NF-κB signaling.** *A*, SRC-1 was upregulated in colon in response to *C. rodentium* infection. *B*, SRC-1 cooperated with p65 to enhance the activity of NF-κB reporter. *C*, SRC-1 cooperated with p65 to enhance the activity of CXCL2 promoter reporter.
